# Supplementary material
Source: HighWire-hosted journal article supplement (http://molpharm.aspetjournals.org/highwire/filestream/76528/field_highwire_adjunct_files/3/online_Figure_3S.pdf)

Figure 3S

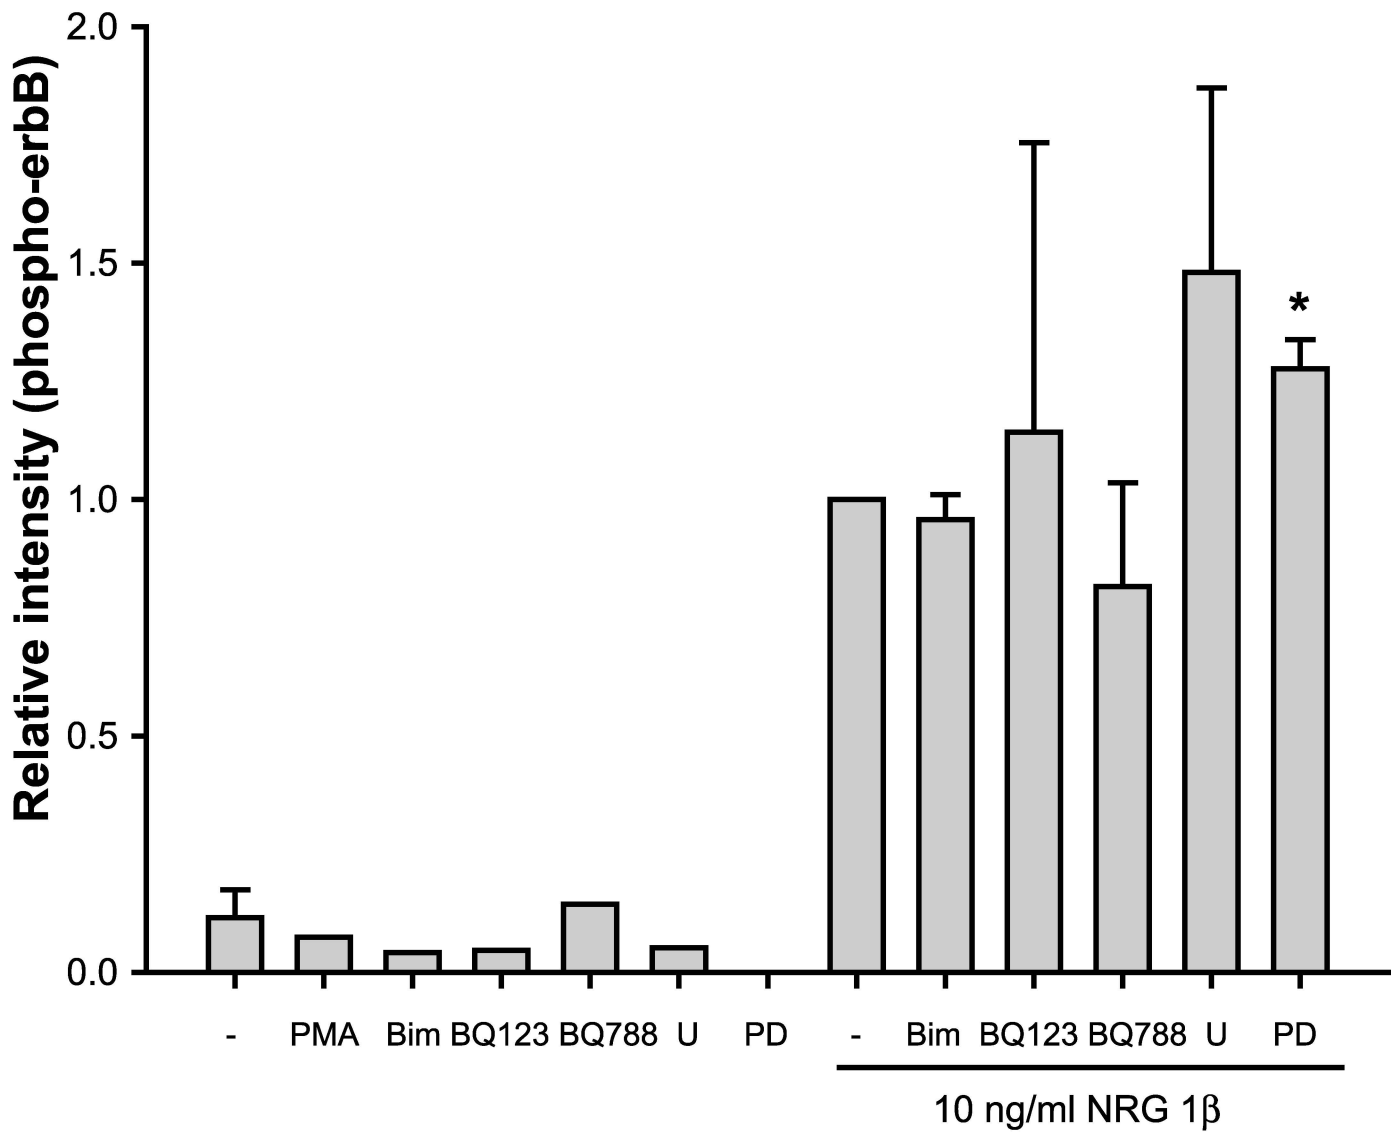

Supplement: online_Figure_3S.pdf [file online_Figure_3S.pdf]
